# Supplementary material for: Defect mediated mechanism in undoped, Cu and Zn-doped TiO2 nanocrystals for tailoring the band gap and magnetic properties
Source: Royal Society of Chemistry journal article supplement (doi:10.1039/c8ra07287f), 2018-01-01
Supplement: c8ra07287f1.pdf [file c8ra07287f1.pdf]

## Supporting Information

### Defect Mediated Mechanism in Undoped, Cu and Zn-Doped TiO<sub>2</sub> Nanocrystals for Tailoring the Band gap and Magnetic Properties

V. R. Akshay<sup>1,2</sup>, B. Arun<sup>1,2</sup>, Shubhra Dash<sup>3</sup>, Ajit K. Patra<sup>3</sup>, Guruprasad Mandal<sup>4</sup>, Geetah. R. Mutta<sup>5</sup>, Anupama Chanda<sup>6\*</sup> and M. Vasundhara<sup>1,2\*</sup>

<sup>1</sup>Materials Science and Technology Division, CSIR-National Institute for Interdisciplinary Science and Technology, Trivandrum -695 019, India.

<sup>2</sup>Academy of Scientific and Innovative Research (AcSIR), CSIR, Trivandrum, India.

<sup>3</sup>Department of Physics, Central University of Rajasthan

<sup>4</sup>Centre for Rural and Cryogenic Technologies, Jadavpur University, Kolkata-700032

<sup>5</sup>Nano-Materials Laboratory, School of Engineering and Physical Sciences, Heriot Watt University, Edinburgh EH14 4AS, United Kingdom

<sup>6</sup>Department of Physics, Dr Hari Singh Gour Central University, Sagar, India

\*Corresponding author: mvas@niist.res.in, [anupamamatsc@gmail.com](mailto:anupamamatsc@gmail.com)

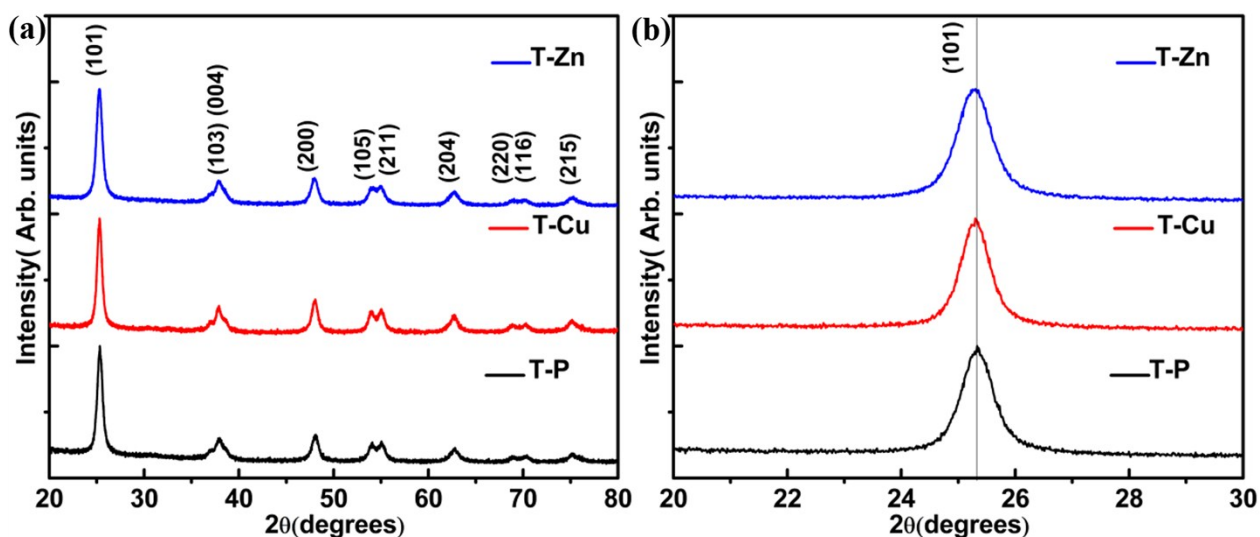

**Fig.S1:** (a) Indexed XRD patterns of anatase T-P, T-Cu and T-Zn (b) peak shift associated with T-P, T-Cu and T-Zn

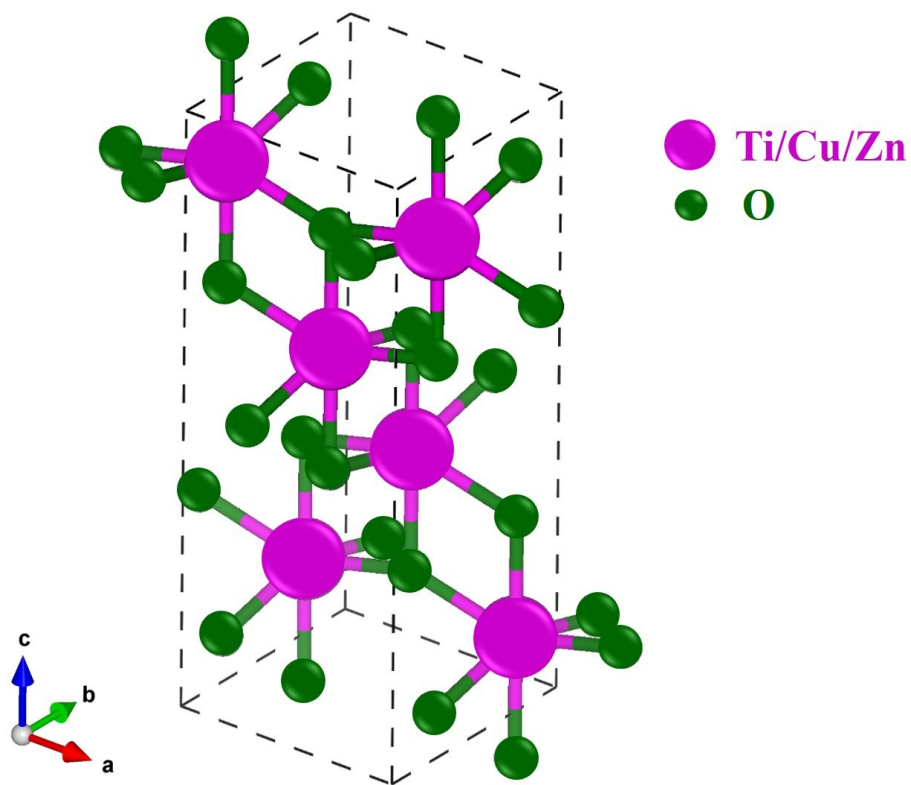

**Fig.S2:** Crystal structure of anatase TiO<sub>2</sub>

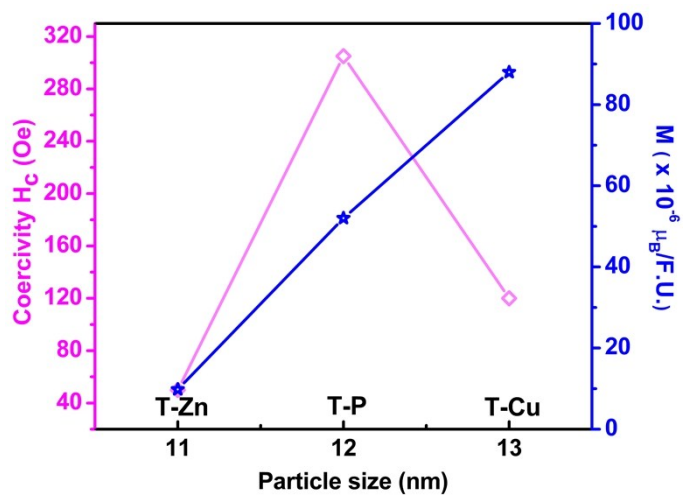

**Fig.S3:** Variation of coercivity and magnetization with particle size

**Table S1:** FTIR spectra of different vibration bands of T-P, T-Cu and T-Zn

| <b>Vibration modes<br/>(cm<sup>-1</sup>)</b> | <b>T-P</b> | <b>T-Cu</b> | <b>T-Zn</b> |
|----------------------------------------------|------------|-------------|-------------|
| O-Ti-O stretching                            | 551        | 553         | 557         |
| O-H-O bending                                | 1630       | 1630        | 1630        |
| O-H stretching                               | 3455       | 3501        | 3504        |
| C-O stretching                               | 1384       | 1384        | 1384        |
| CO <sub>2</sub> molecules in air             | 2347       | 2347        | 2347        |
